# Supplementary material for: Fine structural and morphological control of rare earth fluorides REF3(RE = La–Lu, Y) nano/microcrystals: microwave-assisted ionic liquid synthesis, magnetic and luminescent properties
Source: Royal Society of Chemistry journal article supplement (doi:10.1039/c0ce00186d), 2010-10-29
Supplement: c0ce00186d.pdf [file c0ce00186d.pdf]

## Electronic Supplementary Information

### **Fine Structural and Morphological Control of Rare Earth Fluorides REF<sub>3</sub> (RE = La-Lu, Y) Nano/Microcrystals: Microwave-Assisted Ionic Liquid Synthesis, Magnetic and Luminescent Properties**

**Chunxia Li<sup>†</sup>, Piaoping Yang<sup>†, ‡</sup>, Zhenhe Xu<sup>†</sup>, Guogang Li<sup>†</sup>, Dongmei Yang<sup>†</sup>,  
Chong Peng<sup>†</sup> and Jun Lin<sup>\*†</sup>**

<sup>†</sup> *State Key Laboratory of Rare Earth Resource Utilization, Changchun Institute of Applied  
Chemistry, Chinese Academy of Sciences, Changchun 13002, P. R. China*

<sup>‡</sup> *College of Materials Science and Chemical Engineering, Harbin Engineering University,  
Harbin 150001, P. R. China*

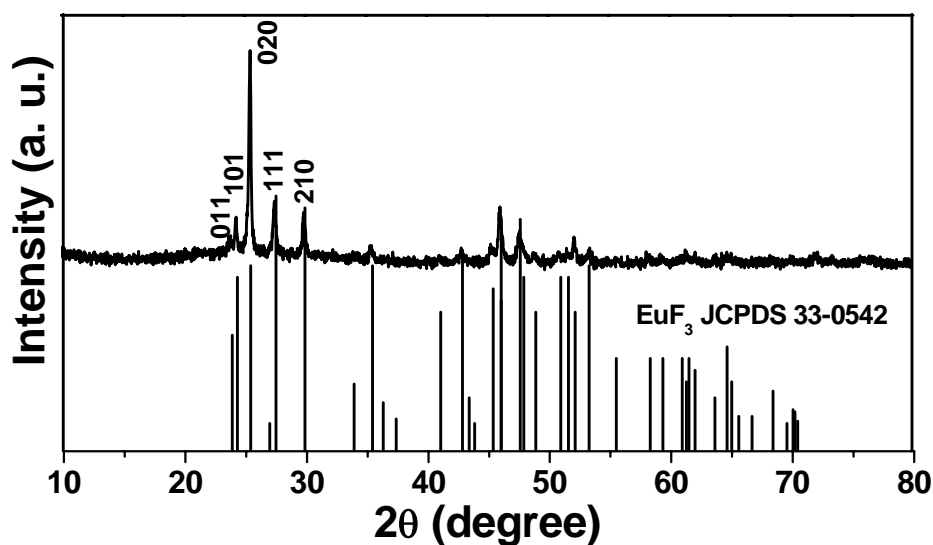

**Fig. S1** XRD pattern of as-obtained EuF<sub>3</sub> and its standard card (JCPDS 33-0542).

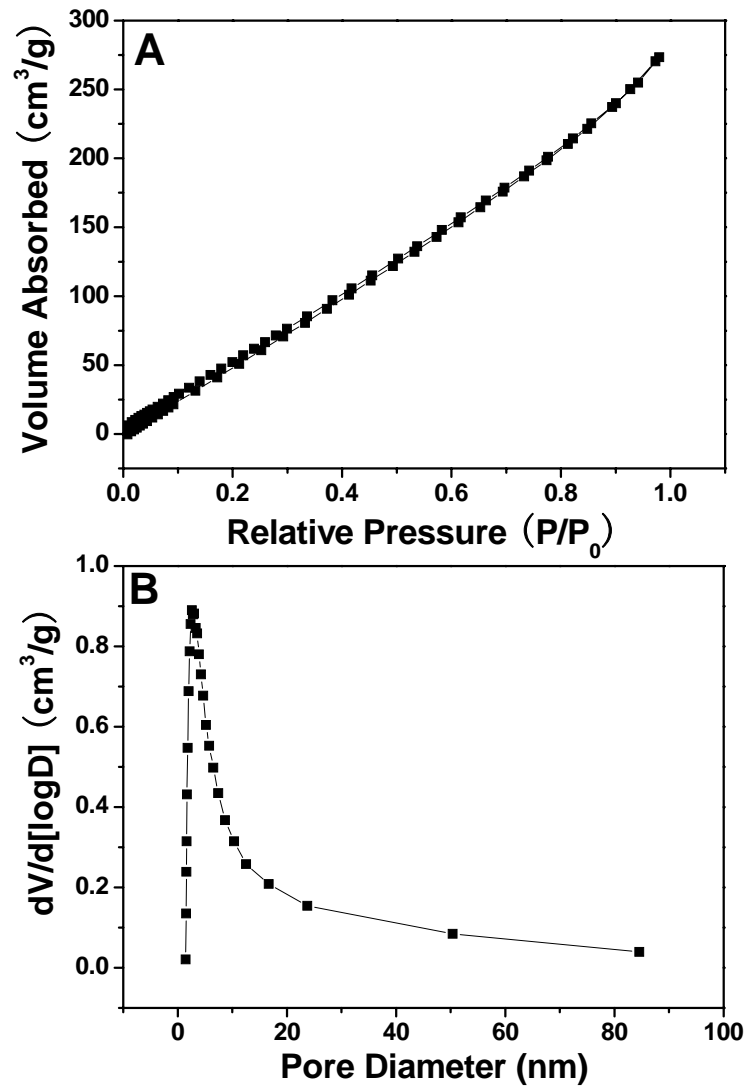

**Fig. S2** Nitrogen adsorption/desorption isotherm and corresponding pore size distribution of LaF<sub>3</sub> sample.

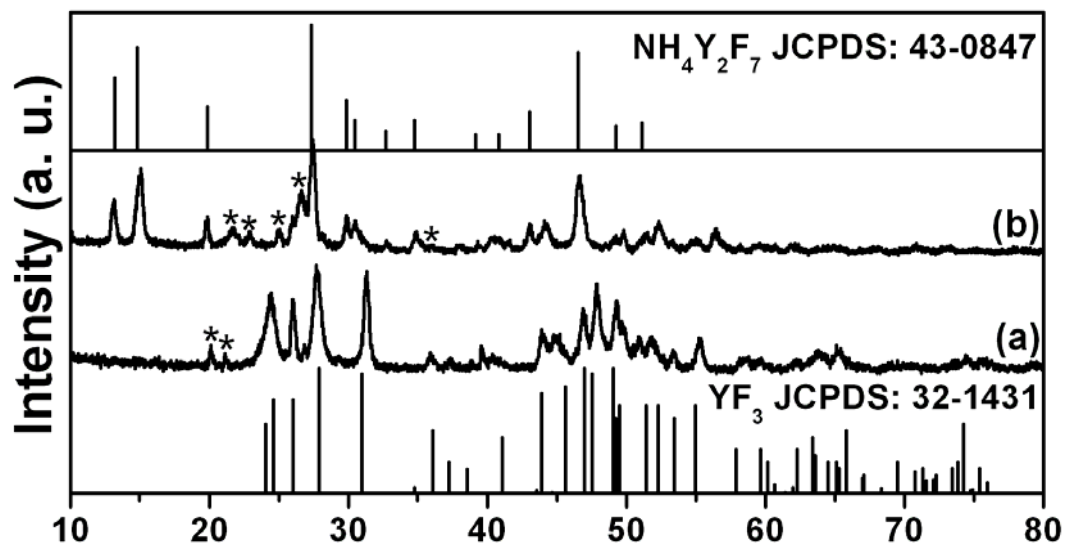

**Fig. S3** XRD patterns of the as-prepared products using  $\text{NaBF}_4$  (a) and  $\text{NH}_4\text{F}$  (b) as  $\text{F}^-$  source (\* denoted as impurity). The standard data of  $\text{NH}_4\text{Y}_2\text{F}_7$  (JCPDS 43-0847) and  $\text{YF}_3$  (JCPDS 32-1431) were given as references.

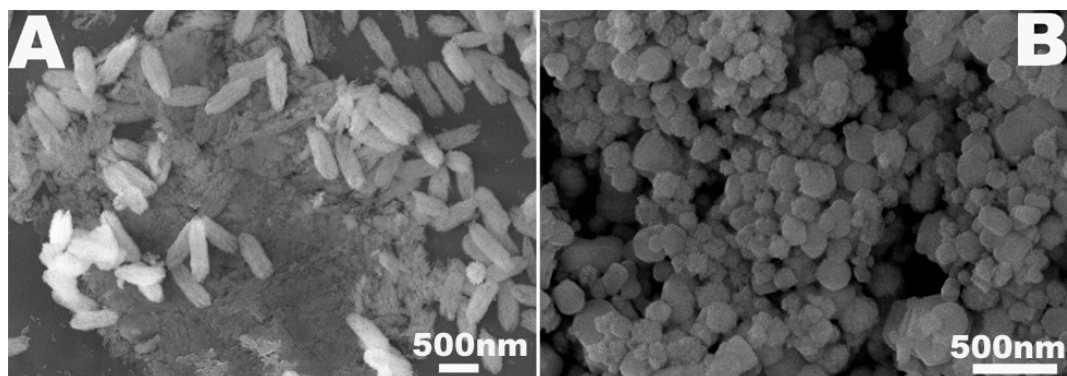

**Fig. S4** SEM images of the as-prepared products using  $\text{NaBF}_4$  (A) and  $\text{NH}_4\text{F}$  (B) as  $\text{F}^-$  source.

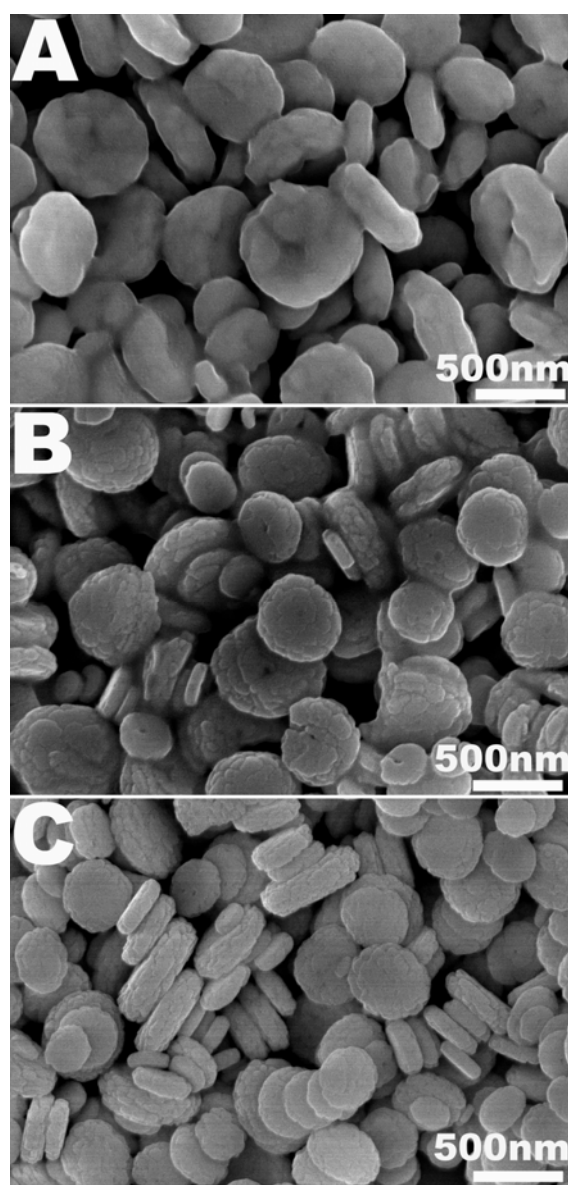

**Fig. S5** SEM images of  $\text{EuF}_3$  obtained under microwave irradiation for different time intervals of (A) 1 min, (B) 10 min, (C) 20 min.

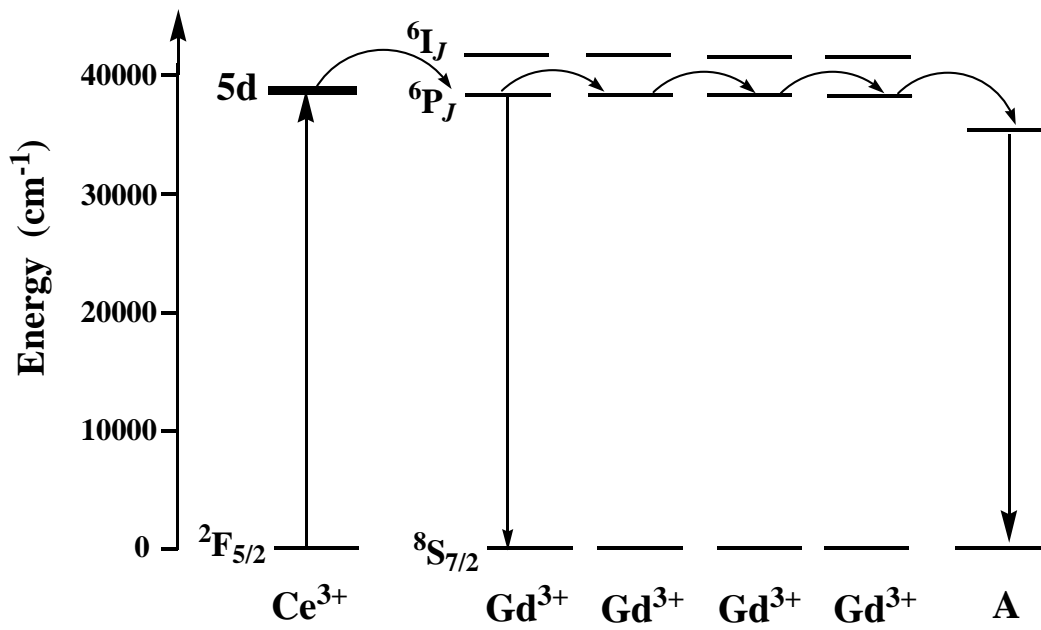

**Fig. S6** Schematic energy level diagram showing luminescence mechanism in the  $GdF_3:Ce^{3+}/Ln^{3+}$ . A represents the activator ion (Tb, Eu, or Dy).

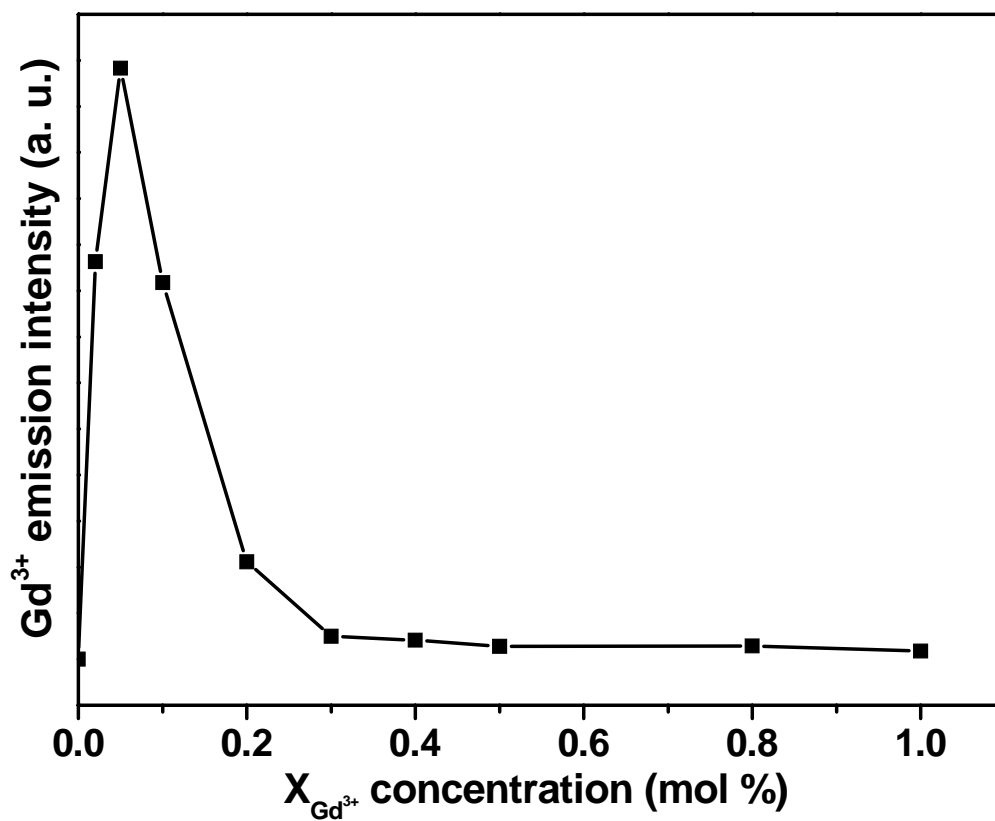

**Fig. S7** Relative emission intensity of Gd<sup>3+</sup> versus Gd<sup>3+</sup> concentration (x) in Y<sub>1-x</sub>Gd<sub>x</sub>Ce<sub>0.01</sub>Dy<sub>0.01</sub>F<sub>3</sub>.
